# Supplementary material for: Carbon fiber–ZnO nanowire hybrid structures for flexible and adaptable strain sensors
Source: Royal Society of Chemistry journal article supplement (doi:10.1039/c3nr03536k), 2013-01-01
Supplement: c3nr03536k.pdf [file c3nr03536k.pdf]

# Supporting Information

## Carbon fiber-ZnO nanowire hybrid structure for flexible and adaptable strain sensors

Qingliang Liao,<sup>a</sup> Markus Mohr,<sup>b</sup> Xiaohui Zhang,<sup>a</sup> Zheng Zhang,<sup>a</sup> Yue Zhang,<sup>\*a</sup>  
Hans-Jörg Fecht,<sup>\*b</sup>

<sup>a</sup>Department of Materials Physics, State Key Laboratory for Advanced Metals and Materials, University of Science and Technology Beijing, Beijing 100083 China

\*Corresponding Author. Email: [yuezhang@ustb.edu.cn](mailto:yuezhang@ustb.edu.cn)

<sup>b</sup>Institute of Micro and Nanomaterials, Ulm University, Ulm 89081, Germany

\*Corresponding Author. Email: [hans.fecht@uni-ulm.de](mailto:hans.fecht@uni-ulm.de)

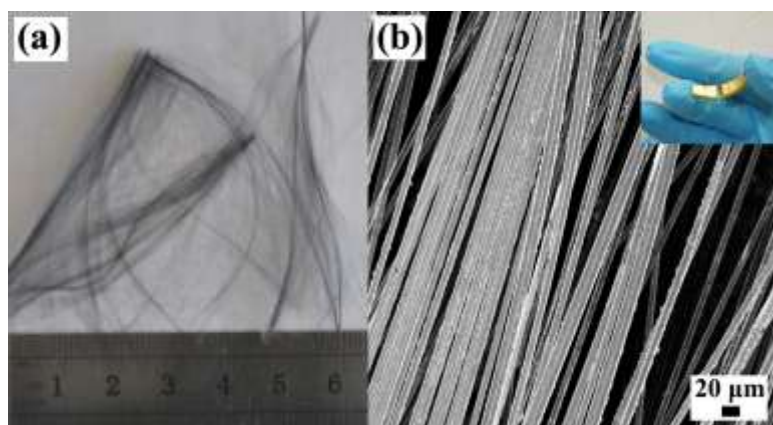

Figure S1. (a) The digital camera photograph of the carbon fiber/ZnO NW hybrid structures, (b) The SEM image of carbon fiber/ZnO NW hybrid structures placed on substrate, and the digital image of the device is shown at the upper right.

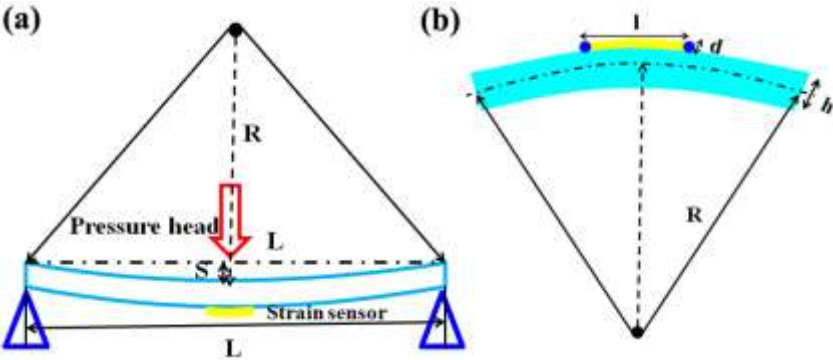

Figure S2. (a) Schematic diagram of the experimental system to measure the performance of the sensor device. (b) Schematic diagram of the bended strain sensor applied with an external force.

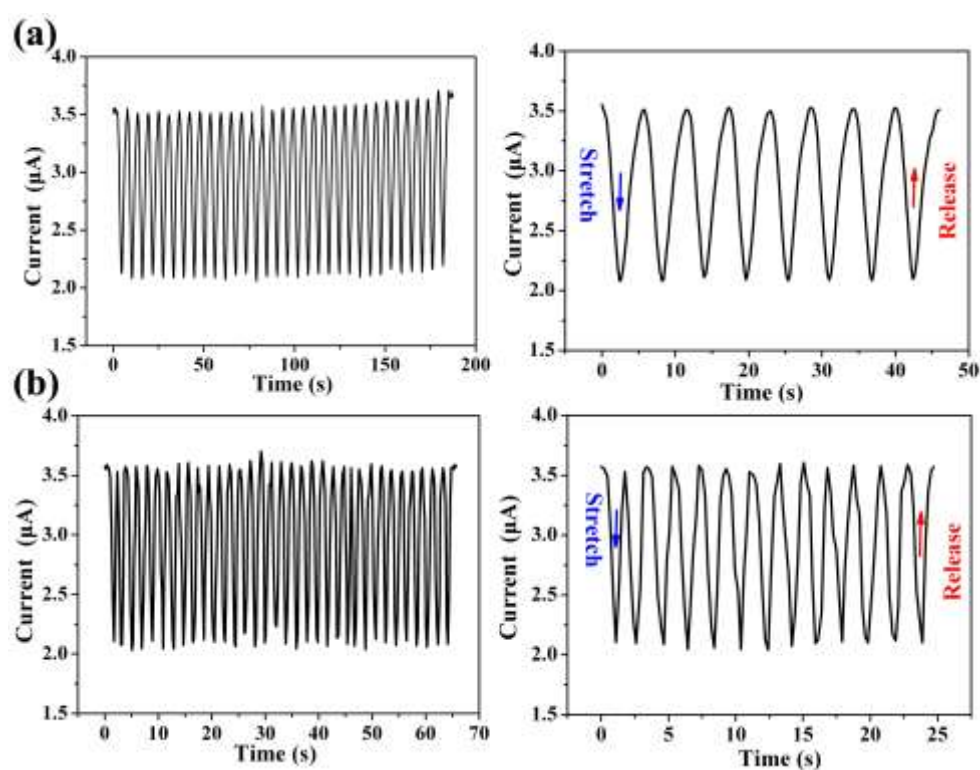

Figure S3. Current response of a sensor device was cyclically stretched at frequencies of 0.5 Hz, and 0.2 Hz under fixed bias of 1 V.
